# Supplementary material for: Adequacy of Nutrient Intake and Malnutrition Risk in Older Adults: Findings from the Diet and Healthy Aging Cohort Study
Source: Nutrients. 2023 Aug 4;15(15):3446. doi: 10.3390/nu15153446 (PMC10421189; doi:10.3390/nu15153446)

## Supplementary materials

### Adequacy of nutrient intake and malnutrition risk in older adults: findings from the Diet and Healthy Aging cohort study

Kaisy Xinhong Ye<sup>1,2</sup>, Lina Sun<sup>3</sup>, Su Lin Lim<sup>4</sup>, Jialiang Li<sup>5</sup>, Brian K. Kennedy<sup>2,6,7</sup>, Andrea Britta Maier<sup>2,6,8</sup>, Lei Feng<sup>1,2,\*</sup>

#### Table of Contents

|                                                           |          |
|-----------------------------------------------------------|----------|
| <i>Text S1. Nutritional Knowledge questionnaire .....</i> | <b>2</b> |
| <i>Figure S1. Flowchart of selection process. ....</i>    | <b>3</b> |

## Text S1. Nutritional Knowledge questionnaire

### Nutrition knowledge

1. Diet can be related to certain diseases. Please answer the following questions based on what you know

|                                                                                                         |      |       |            |
|---------------------------------------------------------------------------------------------------------|------|-------|------------|
| (I) A diet high in fat is related to<br>(1) Gastritis<br>(2) Heart disease                              | True | False | Don't know |
|                                                                                                         | 1    | 2     | N          |
|                                                                                                         | 1    | 2     | N          |
| (II) A diet high in salt / sodium is related to<br>(3) Hypertension (high blood pressure) (4) Arthritis | True | False | Don't know |
|                                                                                                         | 1    | 2     | N          |
|                                                                                                         | 1    | 2     | N          |
| (III) A diet low in fiber is related to<br>(5) Heart disease (6) Constipation                           | True | False | Don't know |
|                                                                                                         | 1    | 2     | N          |
|                                                                                                         | 1    | 2     | N          |
| (IV) A diet low in calcium is related to<br>(7) Diabetes<br>(8) Osteoporosis                            | True | False | Don't know |
|                                                                                                         | 1    | 2     | N          |
|                                                                                                         | 1    | 2     | N          |
| (V) A diet low in iron is related to<br>(9) Anemia<br>(10) Heart disease diseases                       | True | False | Don't know |
|                                                                                                         | 1    | 2     | N          |
|                                                                                                         | 1    | 2     | N          |
| (VI) The consumption of preserved foods is related to (11) Rheumatism<br>(12) Some cancers              | True | False | Don't know |
|                                                                                                         | 1    | 2     | N          |
|                                                                                                         | 1    | 2     | N          |

2. Do you pay attention to dietary and nutrition information?

(1) Always (2) Sometimes (3) Seldom (4) I don't know

3. Your most important sources of nutrition information are:

- (1) Your children
- (2) Your spouse
- (3) Relatives, friends and neighbors
- (4) Book/newspaper/magazine, TV/radio, internet
- (5) Medical practitioners, nurses, dieticians
- (6) Courses or lectures
- (7) Salespeople

**Figure S1.** Flowchart of selection process.

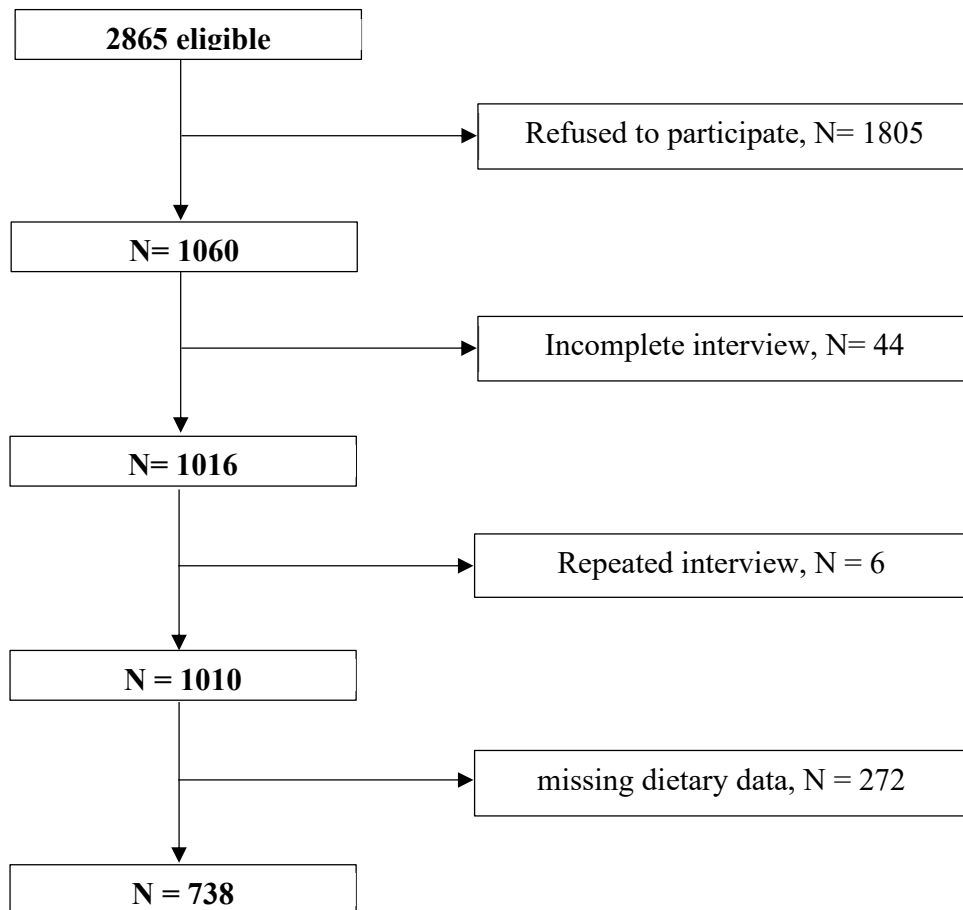

Supplement: Supplementary file 1 [file nutrients-15-03446-s001.zip › nutrients-2525223-supplementary.pdf]
